# Supplementary material
Source: HighWire-hosted journal article supplement (https://erj.ersjournals.com/content/51/1/1701567)
Supplement: inline-supplementary-material-1 [file inline-supplementary-material-1.pdf]

## SUPPLEMENTARY MATERIAL

Supplementary Table S1: Baseline Medications

| n (%)                                   | Usual Care | Intervention |
|-----------------------------------------|------------|--------------|
| Bronchodilator                          | 222 (95)   | 227 (96)     |
| Steroid                                 | 213 (91)   | 213 (90)     |
| Antihypertensive                        | 159 (68)   | 147 (62)     |
| Cholesterol lowering                    | 116 (50)   | 113 (48)     |
| PPI/H2 blocker                          | 110 (47)   | 88 (37)      |
| Anticoagulant                           | 108 (46)   | 104 (44)     |
| Mood disorders including antipsychotics | 86 (37)    | 79 (33)      |
| Diuretic                                | 74 (32)    | 67 (28)      |
| Vitamins and minerals                   | 65 (28)    | 57 (24)      |
| Analgesic                               | 49 (21)    | 50 (21)      |
| Glucose lowering                        | 41 (18)    | 35 (15)      |
| Osteoporosis                            | 38 (16)    | 35 (15)      |
| Thyroid hormone                         | 29 (12)    | 33 (14)      |
| Prostatic hyperplasia                   | 26 (11)    | 31 (13)      |
| Antibiotic                              | 26 (11)    | 30 (13)      |
| Laxative                                | 25 (11)    | 18 (8)       |
| Anti-seizure                            | 21 (9)     | 19 (8)       |
| Smoking cessation                       | 20 (9)     | 15 (6)       |
| Anti-arrhythmic                         | 14 (6)     | 18 (8)       |
| Sleep                                   | 14 (6)     | 8 (3)        |
| Gout                                    | 11 (5)     | 10 (4)       |
| Rhinitis                                | 9 (4)      | 8 (3)        |
| Anti-emetic                             | 4 (2)      | 5 (2)        |
| Anti-malarial                           | 5 (2)      | 4 (2)        |
| Anti -Parkinson                         | 5 (2)      | 3 (1)        |
| Urinary retention                       | 5 (2)      | 3 (1)        |
| Anti-spasmodic                          | 5 (2)      | 2 (1)        |
| Anti-viral                              | 4 (2)      | 0 (0)        |
| Bladder muscle spasm                    | 4 (2)      | 0 (0)        |

Supplementary Table S2: Secondary Repeated Measure Outcomes

| Measure. mean (SD)         | N   | Usual Care | PIC COPD+  |
|----------------------------|-----|------------|------------|
| BODE Index                 |     |            |            |
| Baseline                   | 433 | 5.3 (2.6)  | 5.5 (2.6)  |
| 6 months                   | 321 | 6.0 (2.4)  | 5.8 (2.6)  |
| 12 months                  | 319 | 5.8 (2.6)  | 6.0 (2.6)  |
| EQ-5D-3L                   |     |            |            |
| Baseline                   | 350 | 60 (17)    | 58 (20)    |
| 3 months                   | 269 | 61 (17)    | 63 (19)    |
| 6 months                   | 239 | 62 (18)    | 62 (18)    |
| 12 months                  | 232 | 63 (17)    | 65 (19)    |
| St. George's questionnaire |     |            |            |
| Baseline                   | 347 | 54 (20)    | 53 (19)    |
| 3 months                   | 270 | 54 (20)    | 48 (19)    |
| 6 months                   | 242 | 51 (20)    | 48 (19)    |
| 12 months                  | 236 | 52 (21)    | 48 (21)    |
| HADS - depression          |     |            |            |
| Baseline                   | 349 | 6.5 (3.6)  | 6.2 (3.6)  |
| 3 months                   | 271 | 6.8 (3.9)  | 5.8 (3.6)  |
| 6 months                   | 246 | 6.2 (4.0)  | 5.8 (3.8)  |
| 12 months                  | 242 | 6.4 (4.2)  | 5.6 (4.2)  |
| HADS - anxiety             |     |            |            |
| Baseline                   | 345 | 7.8 (4.4)  | 7.5 (4.4)  |
| 3 months                   | 271 | 7.7 (4.6)  | 6.9 (4.7)  |
| 6 months                   | 246 | 7.3 (4.5)  | 6.9 (4.4)  |
| 12 months                  | 240 | 7.0 (4.4)  | 6.2 (4.4)  |
| CSQ8                       |     |            |            |
| 1 month                    | 344 | 28.3 (3.7) | 29.5 (3.0) |
| 3 months                   | 280 | 28.3 (3.8) | 30.0 (2.8) |
| 6 months                   | 257 | 28.0 (3.5) | 29.9 (2.8) |
| 12 months                  | 247 | 28.2 (3.6) | 29.9 (2.8) |

| COPD SES  |     |          |         |
|-----------|-----|----------|---------|
| Baseline  | 135 | 100 (30) | 99 (33) |
| 3 months  | 124 | 97 (32)  | 89 (33) |
| 6 months  | 98  | 101 (33) | 90 (34) |
| 12 months | 102 | 96 (36)  | 87 (33) |

SD: standard deviation; COPD: chronic obstructive pulmonary disease; HADS: Hospital Anxiety and Depression Scale; CSQ: Client Satisfaction Questionnaire; SES: Self-reported Efficacy Score.

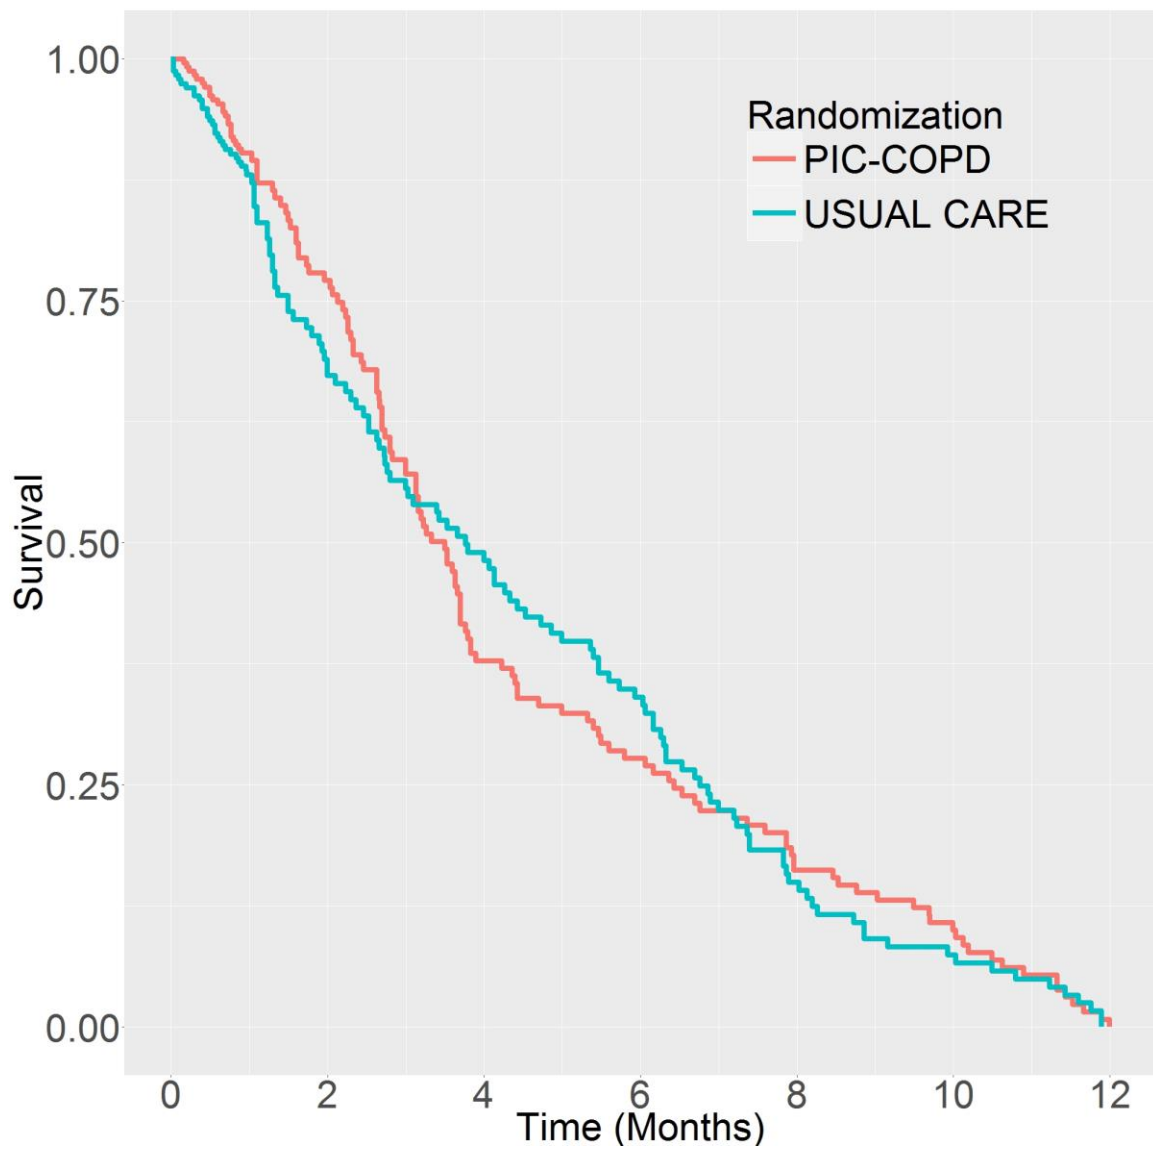

Kaplan-Meier Curves of Time to First ED Visit

| <b><i>COPD Exacerbations in last 12 months</i></b> | <b><i>Minor*</i></b> | <b><i>Major**</i></b> | <b><i>ER Visits</i></b> | <b><i>Hospitalizations</i></b> |
|----------------------------------------------------|----------------------|-----------------------|-------------------------|--------------------------------|
| 0                                                  | 0                    | 0                     | 0                       | 0                              |

*\*time off work/usual activities or increased salbutamol for less than 2 days, \*\*required prednisone with or without antibiotics*

At the next office visit, coaching (C) is recommended on these self-management goals

| <b>Next Visit</b> | <b>Patient Goals</b>                               | <b>Achieved (A)<br/>(Clearly Documented)</b> | <b>Not (NA)<br/>Applicable</b> |
|-------------------|----------------------------------------------------|----------------------------------------------|--------------------------------|
|                   | Has COPD Exacerbation Action Plan                  | A                                            |                                |
|                   | Recognizes exacerbations (flare-ups)               | A                                            |                                |
|                   | Implements Action Plan successfully                | A                                            |                                |
|                   | Scripts for antibiotics & prednisone at pharmacy   | A                                            |                                |
| C                 | Exercise script implemented                        |                                              |                                |
| C                 | Good inhaler technique                             |                                              |                                |
|                   | Action Threshold for top 3 other chronic illnesses |                                              | NA                             |
|                   | COPD Rehabilitation Program enrollment             |                                              | NA                             |

### Smoking Cessation ( \_\_\_ cigs per day)

|                                            |                                        |                                    |                                 |
|--------------------------------------------|----------------------------------------|------------------------------------|---------------------------------|
| <input type="checkbox"/> Pre-contemplative | <input type="checkbox"/> Contemplative | <input type="checkbox"/> Preparing | <input type="checkbox"/> Action |
| <input type="checkbox"/> Maintenance       | <input type="checkbox"/> Relapse       |                                    |                                 |

### Advance Care Planning

|                                                              |                                                               |
|--------------------------------------------------------------|---------------------------------------------------------------|
| <input type="checkbox"/> Topic introduced                    | <input type="checkbox"/> Substitute decision maker identified |
| <input type="checkbox"/> Educational material provided       | <input type="checkbox"/> Goals of treatment confirmed         |
| <input type="checkbox"/> Discussion Initiated                | <input type="checkbox"/> Advance directives documented        |
| <input type="checkbox"/> Family Physician's advice requested | <input type="checkbox"/> Palliative care consult requested    |

### Other Chronic Illnesses

| <b>Condition</b>         | <b>No Action needed</b>                          | <b>You should</b>                                                                              | <b>Contact Family Physician or Case Manager</b>                                                        |
|--------------------------|--------------------------------------------------|------------------------------------------------------------------------------------------------|--------------------------------------------------------------------------------------------------------|
| Congestive heart failure | Usual Weight changes less than 1 pound           | If you gain more than 1 pound, take extra dose of furosemide                                   | Taking extra dose of furosemide more than once a week                                                  |
| Atrial Fibrillation      | Resting pulse rate between 60 and 100 per minute | If pulse greater than 100, take your usual daily heart rate controlling medication immediately | If pulse is still greater than 100 or less than 60 after taking your heart rate controlling medication |
| Diabetes                 | Blood sugar within your target range             | For low blood sugar, immediately take sweets by mouth and repeat blood sugar measurement       | If blood sugar is still low or occurs again that day                                                   |
